# Supplementary material for: Quality assurance of the SCOPE 1 trial in oesophageal radiotherapy
Source: Springer Nature journal article supplement (doi:10.1186/s13014-017-0916-7), 2017-11-15
Supplement: MOESM3 [file 15227154]

Patient Trial No.      Patient Initials    Patient Date of Birth        
dd mm yyyy

Treating Centre: .....

Date of Planning Scan:         IV contrast solution used? Yes  No   
dd mm yy

**TARGET VOLUME DELINEATION**

| Volume                      | Max   | Patient | Target Margins                                    | Protocol                                                 | Patient |
|-----------------------------|-------|---------|---------------------------------------------------|----------------------------------------------------------|---------|
| Disease length (EUS+CT±PET) | 10 cm |         | GTV to CTVB S-I                                   | 2.0 cm                                                   |         |
| Outlined GTV length         | 10 cm |         | GTV to CTVB Lat/AP*                               | 1.0 cm                                                   |         |
| CTVB length S-I             | 14 cm |         | CTV definition inferiorly (delete as appropriate) | <b>OES / STOMACH / MIXED</b>                             |         |
| PTV length S-I              | 16 cm |         | *CTVB post margin altered?                        | Yes <input type="checkbox"/> No <input type="checkbox"/> |         |
| Anterior fields length S-I  | 17 cm |         | Extent CTVB modification, from                    | to                                                       |         |
| GTV volume (cc)             | NA    |         | CTVB to PTV S-I                                   | 1.0 cm                                                   |         |
| CTVB volume (cc)            | NA    |         | CTVB to PTV Lat/AP                                | 0.5 cm                                                   |         |
| PTV volume (cc)             | NA    |         |                                                   |                                                          |         |

**PRESCRIPTION**

|                 |  |       |  |           |                                        |
|-----------------|--|-------|--|-----------|----------------------------------------|
| Prescribed dose |  | Gy in |  | Fractions | N.B. Protocol prescription 50Gy in 25# |
|-----------------|--|-------|--|-----------|----------------------------------------|

**DOSE REPORTING - Organs at Risk**

| OAR             | Level                 | Objective | Achieved | Comments |
|-----------------|-----------------------|-----------|----------|----------|
| Combined lungs  | Volume receiving 20Gy | <25%      | %        |          |
| Heart           | Volume receiving 40Gy | <30%      | %        |          |
| Liver           | Volume receiving 30Gy | <60%      | %        |          |
| Rt kidney       | Volume receiving 20Gy | <25%      | %        |          |
| Lt kidney       | Volume receiving 20Gy | <25%      | %        |          |
| Spinal Cord PRV | Volume receiving 40Gy | 0%        | %        |          |
|                 | Dose to 1cc           | <40Gy     | Gy       |          |

|                           |                             |           |  |        |
|---------------------------|-----------------------------|-----------|--|--------|
| ICRU defined maximum dose | Objective: Max 107%/ 53.5Gy | Achieved: |  | % / Gy |
|---------------------------|-----------------------------|-----------|--|--------|

Completed by: Name .....

Signed .....     
d mm yy

Patient Trial No.      Patient Initials    Patient Date of Birth        
dd mm yyyy

**DOSE REPORTING - PTV**

TPS:..... Version:.....

Algorithm Used

Complete this section where **Type A algorithm** has been used (e.g. Pencil Beam, Fast Fourier Transform)

| PTV                              | Objective | Achieved | Comments |
|----------------------------------|-----------|----------|----------|
| Volume of PTV receiving 95% dose | ≥99%      |          | %        |

Complete this section where **Type B Algorithm** has been used (e.g. Collapsed Cone, Multigrid Superposition, Anisotropic Analytical Algorithm, Monte Carlo)

% lung region overlap with PTV:  % of PTV volume

Objective for PTV coverage by 95% dose for Type B algorithms may be calculated using the formula from the revised protocol:

$$V95\% \geq 99 - (0.4 \times \%PTV \text{ overlap})$$

| PTV                              | Objective                             | Achieved | Comments |
|----------------------------------|---------------------------------------|----------|----------|
| Volume of PTV receiving 95% dose | ≥.....<br><small>From formula</small> |          | %        |

**Is there any deviation from the protocol?** Yes  No   
 (If yes please discuss with trial team and comment on reason)

Comments:.....  
 .....  
 .....

Planned: Name .....  
 Signed .....     
d mm yy

Checked: Name .....  
 Signed .....     
d mm yy

Accepted by treating consultant: Name ..... Signed .....     
d mm yy

Completed by: Name ..... Signed .....     
d mm yy
